# Supplementary material for: A water-borne photo-sensitive polyimide precursor for an eco-friendly process of preparing organic thin film transistors
Source: Royal Society of Chemistry journal article supplement (doi:10.1039/d2tc05246f), 2023-01-01
Supplement: d2tc05246f1.pdf [file d2tc05246f1.pdf]

## Supplementary Information

### Water-borne Photo-Sensitive Polyimide Precursor for Eco-friendly Process of Organic Thin Film Transistor

Hyoeun Lee,<sup>1,2†</sup> Dongkyu Kim,<sup>1†</sup> So Hyeon Kim,<sup>1,2</sup> Yujin So,<sup>1,3</sup> Yun Ho Kim,<sup>1,4</sup> Jinsoo Kim,<sup>1</sup>  
Jongmin Park,<sup>1\*</sup> Jeong Ho Cho,<sup>2\*</sup> Jong Chan Won<sup>1,4\*</sup>

<sup>1</sup>Advanced Materials Division, Korea Research Institute of Chemical Technology (KRICT),  
Daejeon 34114, Republic of Korea

<sup>2</sup>Department of Chemical and Biomolecular Engineering, Yonsei University, Seoul 03722,  
Republic of Korea

<sup>3</sup>Department of Chemical and Biomolecular Engineering, Korea Advanced Institute of Science  
and Technology (KAIST), Daejeon, 34141, Korea

<sup>4</sup>Department of Chemical Convergence Materials and Processes, KRICT School, University of  
Science and Technology (UST), Daejeon 34114, Republic of Korea

†Equally contributed.

\*To whom should be addressed: jmp1208@kRICT.re.kr (J. P.), jhcho94@yonsei.ac.kr (J. H. C.),  
jcwon@kRICT.re.kr (J. C. W.)

**Keywords:** Polyimide, Photo-sensitive poly(amic acid) salt, Water-borne polymer, Polyimide  
dielectric, Green process.

#### Contents

Figures S1 – S8

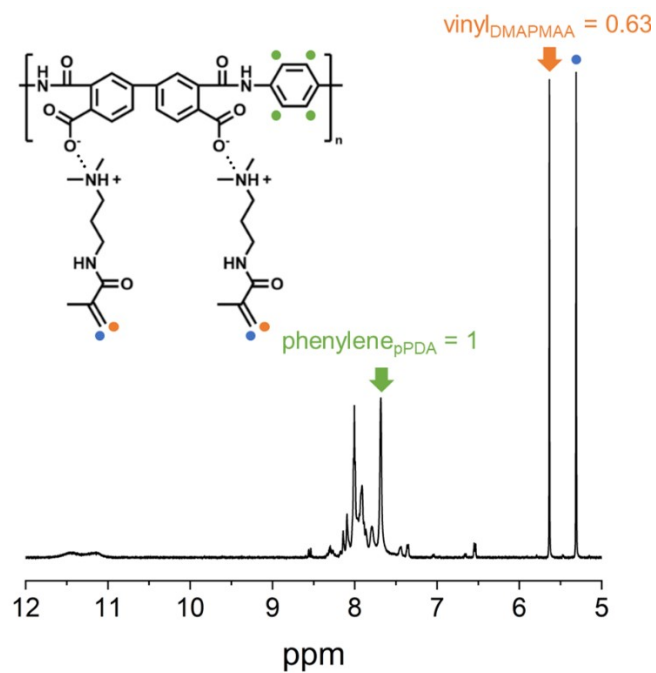

**Figure S1.** Relative integration value of phenylene in the polymer backbone and vinyl protons in the organic base of PAAS-DMAPMAA. The resulting ratio was  $[\text{vinyl}_{\text{DMAPMAA}}] : [\text{phenylene}_{\text{pPDA}}] = 0.63 : 1$ , which is similar to the feed molar ratio in reaction mixture  $[\text{DMAPMAA}] : [\text{pPDA}] = 2 : 1$ .

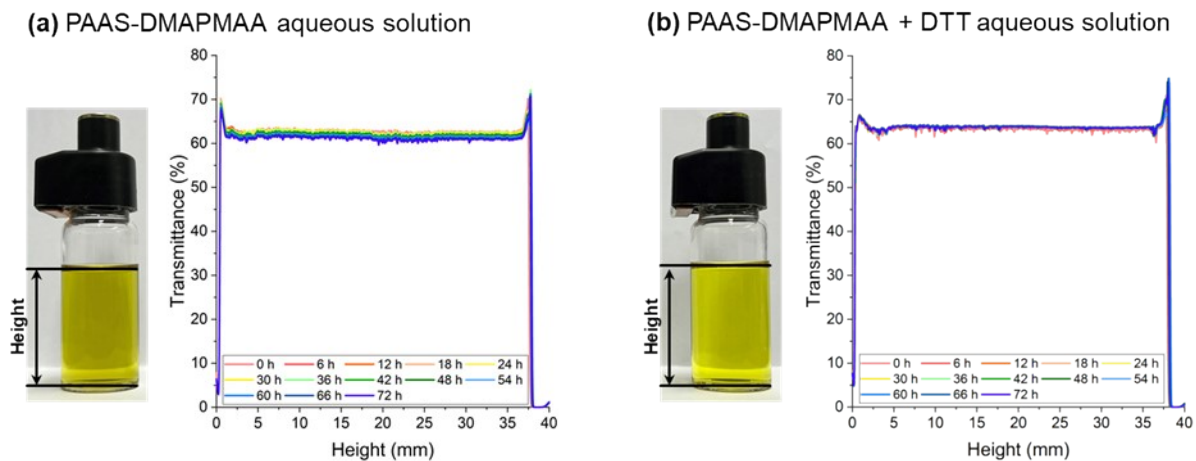

**Figure S2.** Transmittance measurement for the aqueous solution containing (a) 3 wt% of PAAS-DMAPMAA and (b) (2.98 wt% of PAAS-DMAPMAA + 0.62 wt% of DTT). The compositions are identical to the formulation solution in the photo-patterning process.

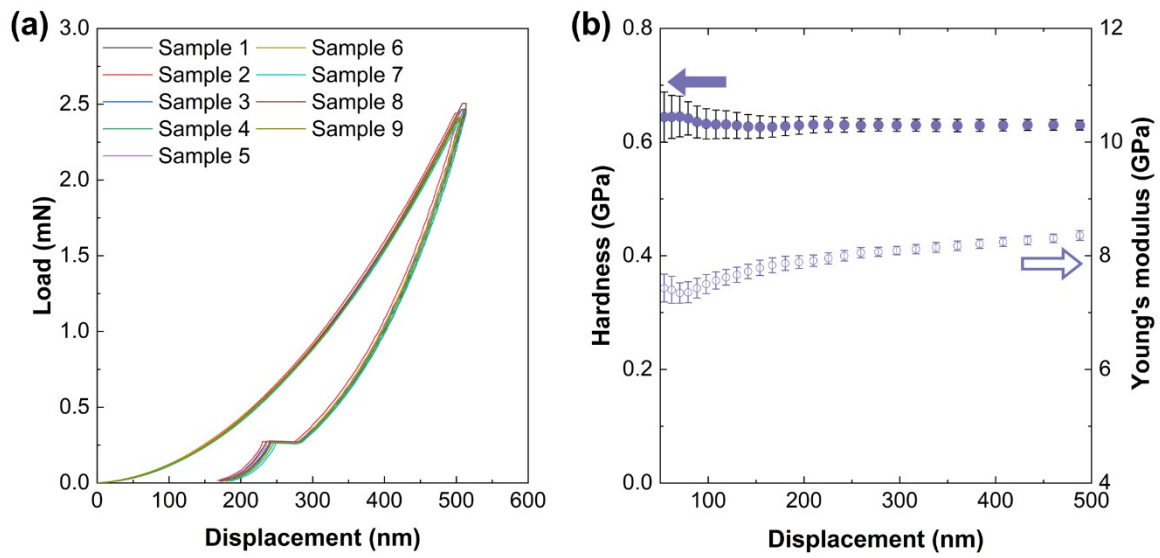

**Figure S3.** (a) Load-displacement response of BPDA-pPDA thin films obtained by nano-indentation test. The sample 8 result is identical to Figure 3(c). (b) The hardness and Young's modulus versus displacement of BPDA-pPDA thin films were calculated from Figure S1(a).

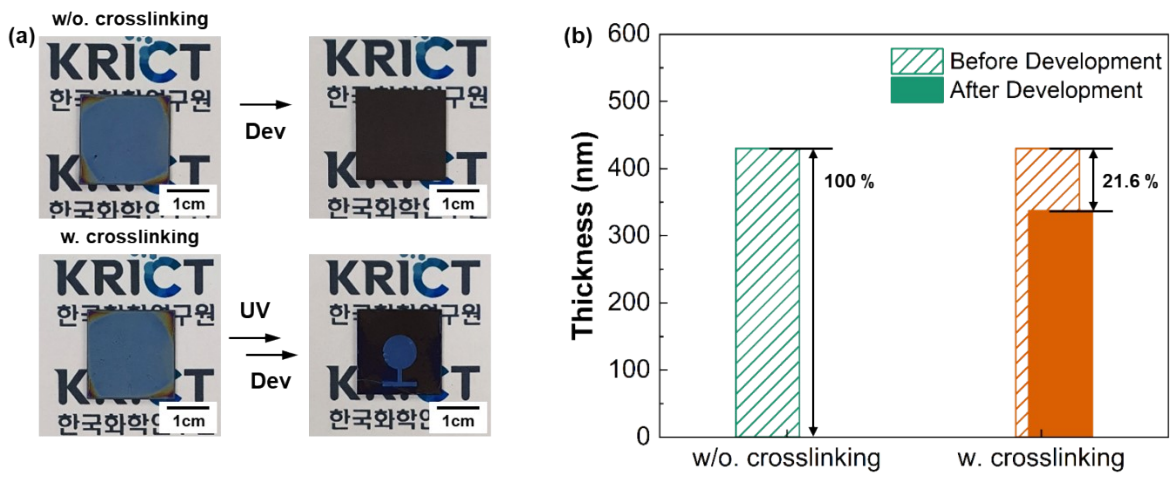

**Figure S4.** (A) Elimination of PAAS-DMAPMAA before and after the photocrosslinking process. (B) The change in thickness was determined by alpha-step measurement.

| Pattern size      | Dot Pattern                                                                        | Line Pattern                                                                        |
|-------------------|------------------------------------------------------------------------------------|-------------------------------------------------------------------------------------|
| 50 $\mu\text{m}$  | 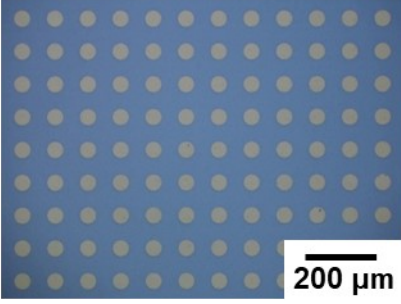  |   |
| 75 $\mu\text{m}$  |   |   |
| 100 $\mu\text{m}$ |  |  |

**Figure S5.** OM images of the dot- and line-patterned photo mask with different pattern sizes.

| Pattern size      | Patterned PAAS-X-linked                                                             | Patterned PI                                                                         |
|-------------------|-------------------------------------------------------------------------------------|--------------------------------------------------------------------------------------|
| 50 $\mu\text{m}$  | 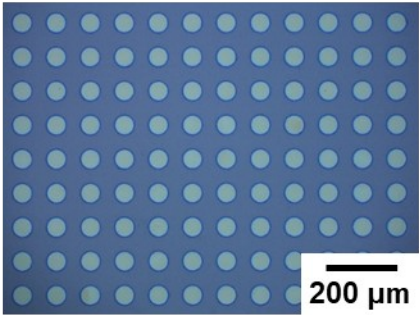   |    |
|                   | Average size = 55.3 ( $\pm$ 1.0) $\mu\text{m}$                                      | Average size = 54.9 ( $\pm$ 0.3) $\mu\text{m}$                                       |
| 75 $\mu\text{m}$  |   |   |
|                   | Average size = 83.5 ( $\pm$ 0.5) $\mu\text{m}$                                      | Average size = 82.5 ( $\pm$ 1.4) $\mu\text{m}$                                       |
| 100 $\mu\text{m}$ |  |  |
|                   | Average size = 109.8 ( $\pm$ 0.6) $\mu\text{m}$                                     | Average size = 108.4 ( $\pm$ 0.9) $\mu\text{m}$                                      |

**Figure S6.** OM images of dot-patterned polymer films with different mask pattern sizes.

| Pattern size      | Patterned PAAS-X-linked                                                             | Patterned PI                                                                         |
|-------------------|-------------------------------------------------------------------------------------|--------------------------------------------------------------------------------------|
| 50 $\mu\text{m}$  | 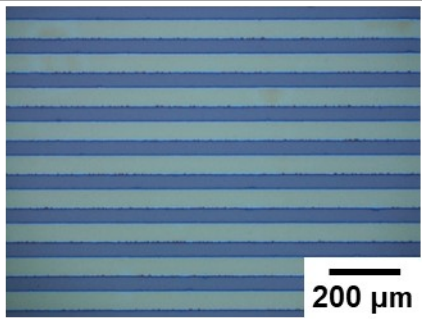   |    |
|                   | Average size = 54.7 ( $\pm$ 0.3) $\mu\text{m}$                                      | Average size = 52.9 ( $\pm$ 0.3)                                                     |
| 75 $\mu\text{m}$  |   |   |
|                   | Average size = 80.3 ( $\pm$ 0.1)                                                    | Average size = 77.2 ( $\pm$ 0.7)                                                     |
| 100 $\mu\text{m}$ |  |  |
|                   | Average size = 104.5 ( $\pm$ 0.5)                                                   | Average size = 102.8 ( $\pm$ 1.6)                                                    |

**Figure S7.** OM images of line-patterned polymer films with different mask pattern sizes.



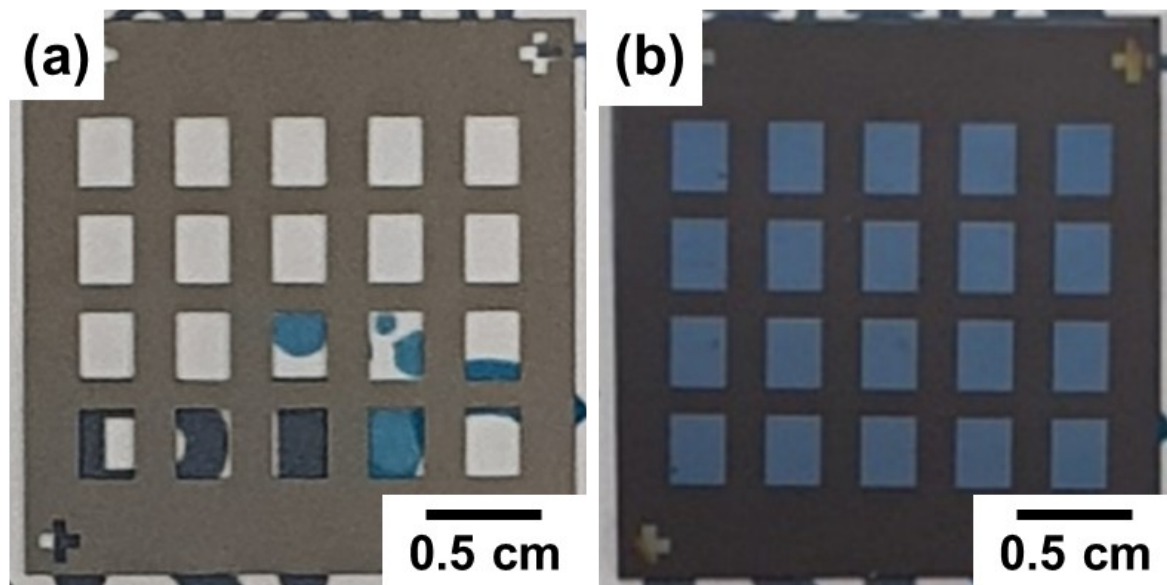

**Figure S8.** (a) Visual images of photo-mask for micropatterned TFT device fabrication. (b) The micropatterned PI was fabricated via the photo-lithography and thermal imidization processes by using the mask depicted in (a).
